# Supplementary material
Source: HighWire-hosted journal article supplement (https://bmjopenquality.bmj.com/highwire/filestream/136042/field_highwire_adjunct_files/0/ds4566.docx)

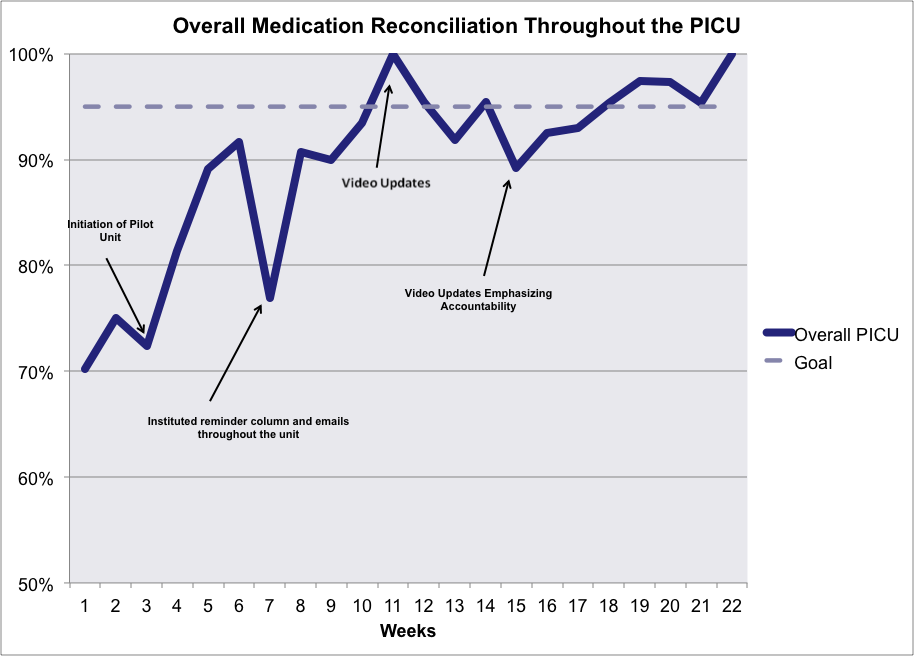

Supplement: ds4566.docx [file ds4566.docx]
